# Supplementary material
Source: PubMed Central journal article supplement (PMC2633861)

## Supplemental Data

**Table S1. Salt stress regulated rice root apoplastic proteins**

| Spot No*. | Accession No. | Protein name                                 | Theoretical | Experimental | Queries Matched | Sequence Coverage (%) | Mascot Score | Predicted location** |
|-----------|---------------|----------------------------------------------|-------------|--------------|-----------------|-----------------------|--------------|----------------------|
|           |               |                                              | pI/MW       | pI/ MW       |                 |                       |              |                      |
| 1         | gi 19387274   | OsRMC                                        | 5.01/27916  | 4.59/43132   | 16              | 62%                   | 192          | s                    |
| 2         | gi 34393251   | peroxidase precursor                         | 5.77/33311  | 5.86/33990   | 12              | 52%                   | 86           | s                    |
| 3         | gi 2429292    | Peroxidase 2 precursor                       | 5.51/33042  | 6.02/32949   | 13              | 50%                   | 97           | s                    |
| 4         | gi 4884530    | peroxidase precursor                         | 5.77/33311  | 5.81/32420   | 14              | 44%                   | 101          | s                    |
| 5         | gi 4884530    | beta-1,3-glucanase                           | 7.01/35699  | 6.98/31781   | 16              | 60%                   | 158          | s                    |
| 6         | gi 19387274   | OsRMC                                        | 5.01/27916  | 5.01/25859   | 9               | 43%                   | 76           | s                    |
| 7         | gi 5931625    | rab5B                                        | 6.84/21748  | 6.65/191760  | 6               | 36%                   | 65           | -                    |
| 8         | gi 33440014   | Prb1 (putative pathogenesis-related protein) | 4.32/17452  | 4.32/15432   | 6               | 64%                   | 75           | s                    |
| 9         | gi 34394950   | putative beta-1,3-glucanase                  | 4.98/59363  | 4.98/16024   | 11              | 22%                   | 71           | s                    |
| 10        | gi 3915131    | Thioredoxin H-type (TRX-H)                   | 5.16/13319  | 5.4/15023    | 9               | 55%                   | 79           | -                    |

\* Spot numbers from the analyses shown in Figure 2

\*\*Location of identified proteins was predicted by TargetP

(<http://www.cbs.dtu.dk/services/TargetP>). S: contained signal peptide in secretory pathway. -: any other location

**Table S2. Primers sequences used in gene construction and Q-PCR**

| Purpose                    | Sequence                                                  |
|----------------------------|-----------------------------------------------------------|
| <i>35S::OsRMC-YFP</i>      | 5' <u>CCATGG</u> CGCGGTGCACTTTG 3'                        |
|                            | 5' <u>CCATGG</u> CCTCACGCAGCACCACCATC 3'                  |
| <i>OsRMCpro::GUS</i>       | 5' <u>AAGCTT</u> GACATGCTGCCTGTCCAGAT 3'                  |
|                            | 5' <u>TCTAGAT</u> GCAATGGCAGTGATCGTTA 3'                  |
| RNAi                       | 5' <u>GGGTACC</u> <u>ACTAGT</u> CACTTTGCTCGTTCTCCTCGT 3'  |
|                            | 5' <u>CGGGATCC</u> <u>GAGCTCT</u> GATGTTGGTGCTGCTCATGA 3' |
| <i>Ubi-1pro::OsRMC-GUS</i> | 5' <u>CGGGATCC</u> ATGGCGCGGTGCACTTT 3'                   |
|                            | 5' <u>CGGGATCCC</u> CCTCACGCAGCACCACCATC 3'               |
| Q-PCR ( <i>OsRMC</i> )     | 5' TCGGAGGTGTACCCGTTCTACA 3'                              |
|                            | 5' ACTCTTAATTTGTGCCATTTTATTCTAGCT 3'                      |
| Q-PCR( <i>OsACTIN1</i> )   | 5' ACCATTGGTGCTGAGCGTTT 3'                                |
|                            | 5' CGCAGCTTCCATTCT ATGAA 3'                               |
| Q-PCR ( <i>OsDREB2A</i> )  | 5' AAAAGCGATGGCCCTGATTC 3'                                |
|                            | 5' TTGGCTGGCGCTTTCCT 3'                                   |
| Q-PCR ( <i>Rab16A</i> )    | 5' CACACCACAGCAAGAGCTAAGTG 3'                             |
|                            | 5' TGGTGCTCCATCCTGCTTAAG 3'                               |
| <i>Hygromycin B</i>        | 5' AAGTTCGACAGCGTCTCCGAC 3'                               |
|                            | 5' TCTACACAGCCATCGGTCCAG 3'                               |
| OsRMC purification         | 5' <u>CGGGATCCC</u> GCGGTGCACTTTG 3'                      |
|                            | 5' <u>CGGAATCCC</u> CCTCACGCAGCACCACCATC 3'               |

Figure S1 . MALDI-TOF mass fingerprint of OsRMC. **A**, The polypeptide that matched this peptide ion spectrum was identified as OsRMC. Signal peptide for extracellular secretion (bold italics) and the peptide coverage (underlined) are highlighted. **B**, MALDI-TOF ion spectrum generated from tryptic digest of spot 1 in Figure 2. The spectral peaks show the intensities for different peptides. The peaks of matched peptides in panel A were marked with arrows.

Figure S2 . LC-Mass/Mass result show spot 1 and spot 6 are identical protein. Mass spectrums of spot 1 (A) and spot 6 (B) obtained from a precursor ion with m/z value 753.30 (spot 1) and 753.64 (spot 6)

Figure S3 . Bioinformatic analysis for OsRMC. **A**, predicted signal peptide sites using the SignalP 3.0 prediction program (<http://www.cbs.dtu.dk/services/SignalP/>). **B**, predicted Potential transmembrane domain using the TMHMM2.0 program ([www.cbs.dtu.dk/services/TMHMM2.0/](http://www.cbs.dtu.dk/services/TMHMM2.0/)). **C**, Structure of the OsRMC protein. The DUF26 domains and the putative N-terminal signal peptide are shown. **D**, Prediction of *cis*-acting elements distribution in the promoter region of OsRMC. ACGTG: ABRE; ACCGAGA: DRE; CCGAC: LTRE; TAACTG, AACGG: MYB recognition site; CANNTG: MYC recognition site.

Figure S1

A

1 MARCTLLVLL VAAAVAVVPL AAGQPWATCG DGTYEQGSAY ENLLNLALT  
 51 LRDGASSQEI LFSTGSGNGAA PNTVYGLLLC RGDISRAACY DCGTSVWRDA  
 101 GSACRRAKDV ALVYNECYAR LSDKDDFLAD KVGPGQLTTL MSSTNISSGA  
 151 DVAAYDRAVT RLLAATAEYA AGDIARKLFA TGQRVGADPG FPNLYATAQC  
 201 AFDITLEACR GCLEGLVARW WDTFPANVDG ARIAGPRCLL RSEVYPFYTG  
 251 APMVVLR

B

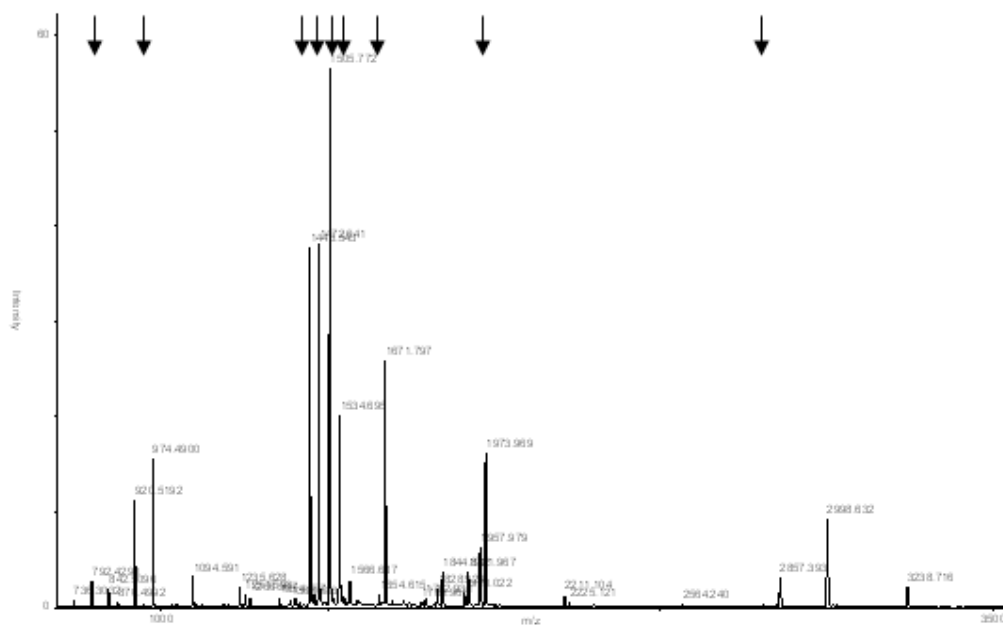

Figure S2

A

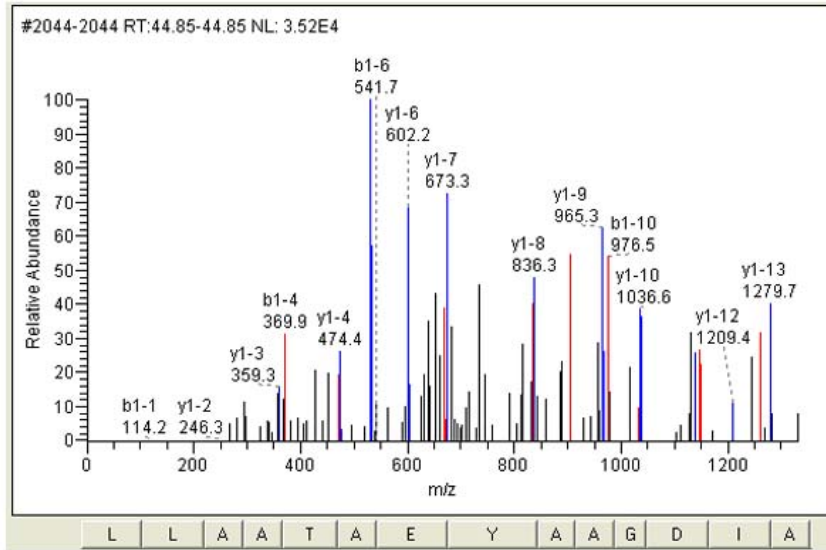

B

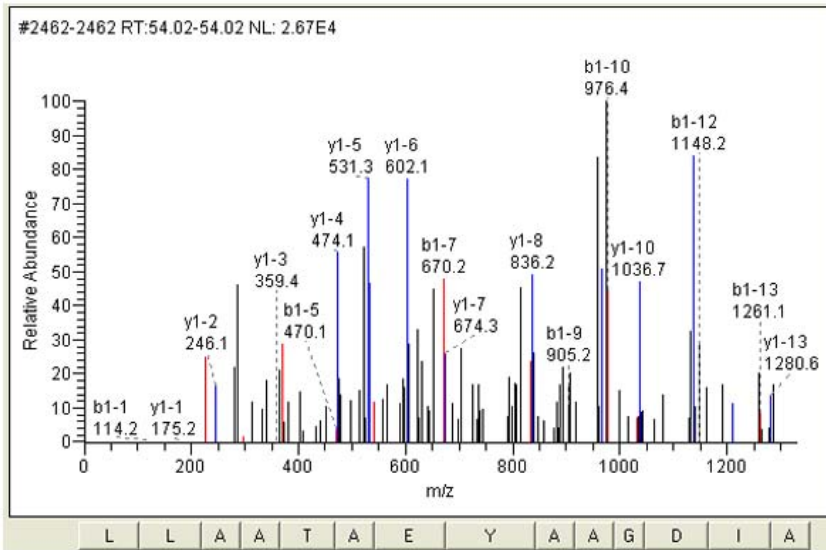

Figure S3

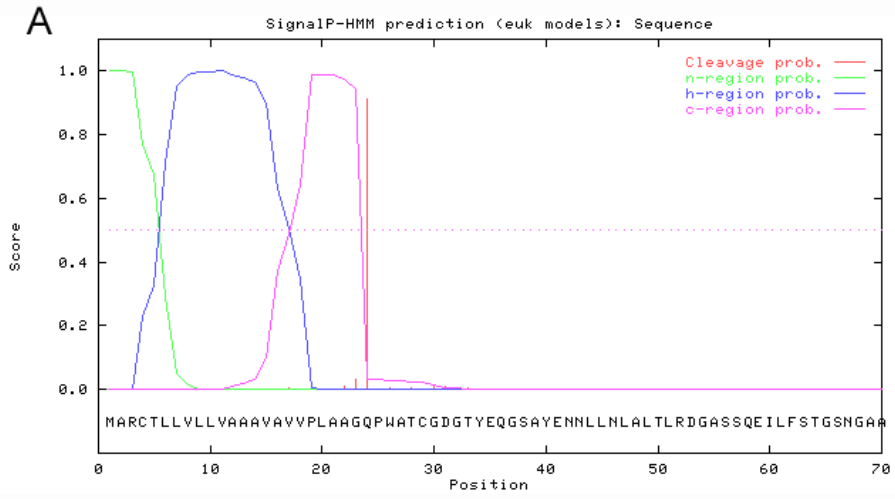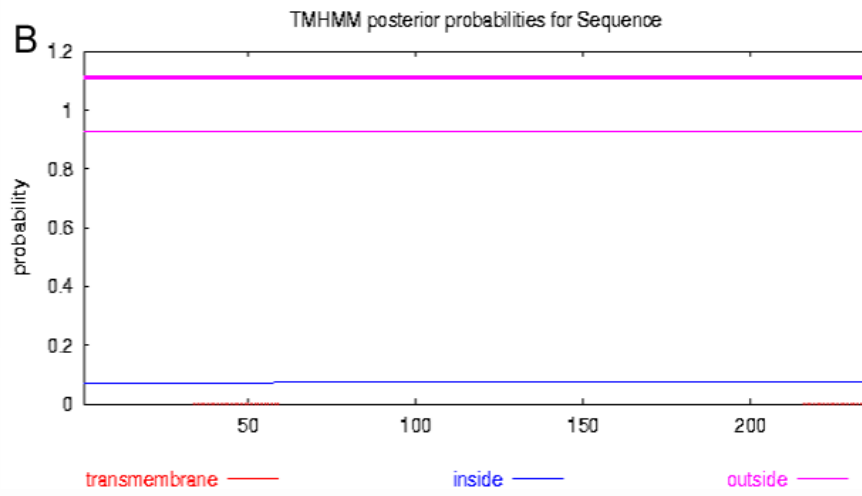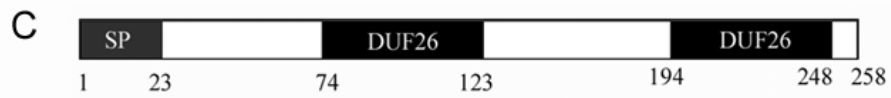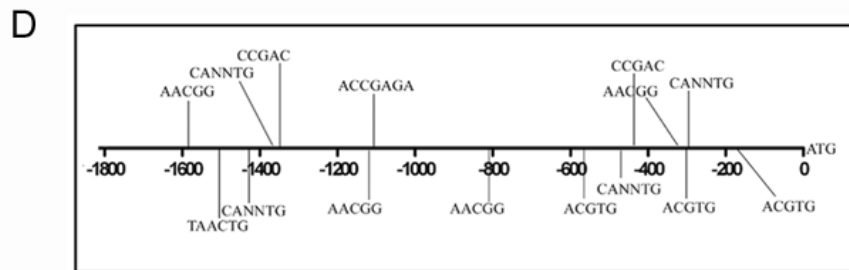

Supplement: pp.108.131144_1.pdf [file pp.108.131144_1.pdf]
